# Supplementary material
Source: HighWire-hosted journal article supplement (https://erj.ersjournals.com/content/56/3/2002210)
Supplement: inline-supplementary-material-1 [file inline-supplementary-material-1.pdf]

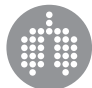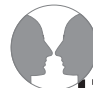

# Blood eosinophils do not predict inhaled budesonide response in bronchiectasis

Stefano Aliberti <sup>1,2</sup>, Giovanni Sotgiu <sup>3</sup> and Miguel-Angel Martinez Garcia<sup>4,5</sup>

**Affiliations:** <sup>1</sup>Fondazione IRCCS Ca' Granda Ospedale Maggiore Policlinico, Respiratory Unit and Cystic Fibrosis Adult Center, Milan, Italy. <sup>2</sup>Università degli Studi di Milano, Dept of Pathophysiology and Transplantation, Milan, Italy. <sup>3</sup>Clinical Epidemiology and Medical Statistics Unit, Dept of Biomedical Sciences, University of Sassari – Research, Medical Education and Professional Development Unit, AOU Sassari, Sassari, Italy. <sup>4</sup>Pneumology Dept, Polytechnic and University La Fe Hospital, Valencia, Spain. <sup>5</sup>CIBERes de enfermedades respiratorias, Madrid, Spain.

**Correspondence:** Stefano Aliberti, Dept of Pathophysiology and Transplantation, University of Milan, Respiratory Unit and Cystic Fibrosis Adult Center, Fondazione IRCCS Ca' Granda Ospedale Maggiore Policlinico, Via Francesco Sforza 35, 20122, Milan, Italy. E-mail: stefano.aliberti@unimi.it

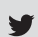

@ERSpublications

**Blood eosinophils do not predict inhaled budesonide response in bronchiectasis** <https://bit.ly/2Yr1b11>

**Cite this article as:** Aliberti S, Sotgiu G, Martinez Garcia M-A. Blood eosinophils do not predict inhaled budesonide response in bronchiectasis. *Eur Respir J* 2020; 56: 2002210 [https://doi.org/10.1183/13993003.02210-2020].

This single-page version can be shared freely online.

## From the authors:

We would like to thank B. Lipworth and co-workers for their feedback on our study, which showed that 6-month treatment with inhaled fluticasone propionate (FP) significantly improved quality of life in bronchiectasis patients with neither asthma nor COPD, and with blood eosinophil counts either  $\geq 3\%$  or  $\geq 150$  cells- $\mu\text{L}^{-1}$  [1, 2]. We agree with B. Lipworth and co-workers on the higher dose-dependent suppression of blood eosinophils due to the systemic absorption of FP. We re-analysed previously published data on bronchiectasis patients treated with budesonide, which has less systemic potency than FP [3]. We carried out a *post hoc* analysis of a randomised, double-blind, parallel-group trial, which enrolled 40 bronchiectasis patients (excluding those with COPD or asthma) who underwent a total of 6-month treatment with budesonide: 20 patients underwent 3 months of 1600  $\mu\text{g}$  daily and, then, 3 months of high dose of budesonide (1600  $\mu\text{g}$  daily), whereas 20 patients underwent 3 months of 1600  $\mu\text{g}$  daily and, then, a low dose of budesonide (640  $\mu\text{g}$ ) plus 9  $\mu\text{g}$  of formoterol. At baseline, median (interquartile range (IQR)) percentage of blood eosinophil counts was 2.8% (2.0–4.1%) and median (IQR) Saint George's Respiratory Questionnaire (SGRQ) value was 38.1 (20.3–56). 38.4% showed an improved quality of life defined by a decreased SGRQ (at least 4 points). No significant differences were found in the median (IQR) percentage of blood eosinophil count at baseline between those who improved ( $\geq 4$  points in the SGRQ) and those who did not improve their quality of life: 3.1% (2.1–4.4%) versus 2.5% (1.9–3.6%), respectively ( $p=0.449$ ). Furthermore, quality of life before and after 6 months of treatment did not change when the sample was stratified using cut-offs of 3% and 150 cells- $\mu\text{L}^{-1}$  of blood eosinophils at baseline (table 1). Unfortunately, data on exhaled nitric oxide fraction were not collected [2, 3]. Although a control group was not recruited and the statistical power was poor, our results seem to support the hypothesis of B. Lipworth and co-workers that a 6-month therapy with budesonide does not improve quality of life in pure bronchiectasis patients without asthma or COPD and with blood eosinophilia ( $\geq 3\%$  or  $\geq 150$  cells- $\mu\text{L}^{-1}$ ). Finally, the repeatability of eosinophil count over time is another interesting point raised

by B. Lipworth and co-workers. A moderate/good concordance of peripheral eosinophil counts (intraclass correlation coefficient (ICC) 0.6) was found from baseline to 12 weeks of follow up in a trial of 86 bronchiectasis patients exposed to FP [4]. However, ICC decreased to 0.4 after 24 weeks of follow-up. Moreover, the results did not change administration of moderate (250 µg twice daily) or high dose (500 µg twice daily) of FP. In conclusion, if our preliminary data were to be confirmed by well-designed randomised controlled trials recruiting bronchiectasis patients with blood eosinophilia exposed to FP *versus* budesonide *versus* other inhaled corticosteroids, the use of inhaled corticosteroids in the bronchiectasis population will have key clinical implications.
